# Supplementary material for: iNR-Drug: Predicting the Interaction of Drugs with Nuclear Receptors in Cellular Networking
Source: PubMed Central journal article supplement (PMC3975431; doi:10.3390/ijms15034915), 2014-03-19
Supplement: ijms-15-04915-s001.pdf [file ijms-15-04915-s001.pdf]

## Supplementary Information

**Supplementary Information S1.** The benchmark dataset contains 258 NR-drug pair samples, of which 86 are interactive and 172 non-interactive. The codes listed here were from the KEGG database at <http://www.kegg.jp/kegg/> (KEGG: Kyoto Encyclopedia of Genes and Genomes, Kanehisa Laboratories, Japan).

| <b>Pair attribute</b> | <b>Target NRs gene code in KEGG</b> | <b>Drug code</b> |
|-----------------------|-------------------------------------|------------------|
| Interactive           | hsa:2099                            | D00066           |
| Interactive           | hsa:2099                            | D00067           |
| Interactive           | hsa:2099                            | D00105           |
| Interactive           | hsa:2099                            | D00312           |
| Interactive           | hsa:2099                            | D00327           |
| Interactive           | hsa:2099                            | D00554           |
| Interactive           | hsa:2099                            | D00577           |
| Interactive           | hsa:2099                            | D00898           |
| Interactive           | hsa:2099                            | D00950           |
| Interactive           | hsa:2099                            | D00954           |
| Interactive           | hsa:2099                            | D00962           |
| Interactive           | hsa:2099                            | D01161           |
| Interactive           | hsa:2099                            | D01294           |
| Interactive           | hsa:2099                            | D02217           |
| Interactive           | hsa:2099                            | D02367           |
| Interactive           | hsa:2099                            | D04066           |
| Interactive           | hsa:190                             | D00094           |
| Interactive           | hsa:2100                            | D00105           |
| Interactive           | hsa:2100                            | D00577           |
| Interactive           | hsa:2100                            | D01161           |
| Interactive           | hsa:2100                            | D02217           |
| Interactive           | hsa:2100                            | D04066           |
| Interactive           | hsa:2101                            | D00577           |
| Interactive           | hsa:2103                            | D00577           |
| Interactive           | hsa:2104                            | D00577           |
| Interactive           | hsa:2908                            | D00088           |
| Interactive           | hsa:2908                            | D00246           |
| Interactive           | hsa:2908                            | D00585           |
| Interactive           | hsa:2908                            | D01387           |
| Interactive           | hsa:2908                            | D01689           |
| Interactive           | hsa:3174                            | D05341           |
| Interactive           | hsa:367                             | D00075           |
| Interactive           | hsa:367                             | D00327           |
| Interactive           | hsa:367                             | D00462           |
| Interactive           | hsa:367                             | D00585           |
| Interactive           | hsa:367                             | D00586           |
| Interactive           | hsa:367                             | D00956           |
| Interactive           | hsa:367                             | D00961           |
| Interactive           | hsa:367                             | D00965           |
| Interactive           | hsa:4306                            | D00443           |

## Supplementary Information S1. Cont.

| Pair attribute | Target NRs gene code in KEGG | Drug code |
|----------------|------------------------------|-----------|
| Interactive    | hsa:4306                     | D00585    |
| Interactive    | hsa:4306                     | D01115    |
| Interactive    | hsa:5241                     | D00066    |
| Interactive    | hsa:5241                     | D00182    |
| Interactive    | hsa:5241                     | D00585    |
| Interactive    | hsa:5241                     | D00690    |
| Interactive    | hsa:5241                     | D00950    |
| Interactive    | hsa:5241                     | D00951    |
| Interactive    | hsa:5241                     | D00954    |
| Interactive    | hsa:5241                     | D01217    |
| Interactive    | hsa:5241                     | D01294    |
| Interactive    | hsa:5241                     | D02367    |
| Interactive    | hsa:5465                     | D00279    |
| Interactive    | hsa:5465                     | D00565    |
| Interactive    | hsa:5468                     | D00596    |
| Interactive    | hsa:5468                     | D00627    |
| Interactive    | hsa:5914                     | D00094    |
| Interactive    | hsa:5914                     | D00316    |
| Interactive    | hsa:5914                     | D00348    |
| Interactive    | hsa:5914                     | D01132    |
| Interactive    | hsa:5915                     | D00094    |
| Interactive    | hsa:5915                     | D00316    |
| Interactive    | hsa:5915                     | D01132    |
| Interactive    | hsa:5916                     | D00094    |
| Interactive    | hsa:5916                     | D00316    |
| Interactive    | hsa:5916                     | D01132    |
| Interactive    | hsa:6095                     | D00040    |
| Interactive    | hsa:6095                     | D01441    |
| Interactive    | hsa:6096                     | D00094    |
| Interactive    | hsa:6096                     | D01132    |
| Interactive    | hsa:6097                     | D00094    |
| Interactive    | hsa:6256                     | D00094    |
| Interactive    | hsa:6256                     | D00316    |
| Interactive    | hsa:6256                     | D01132    |
| Interactive    | hsa:6257                     | D00094    |
| Interactive    | hsa:6257                     | D00316    |
| Interactive    | hsa:6257                     | D01132    |
| Interactive    | hsa:7421                     | D00187    |
| Interactive    | hsa:7421                     | D00188    |
| Interactive    | hsa:7421                     | D00299    |
| Interactive    | hsa:7421                     | D00930    |
| Interactive    | hsa:8856                     | D00143    |
| Interactive    | hsa:8856                     | D00211    |
| Interactive    | hsa:8856                     | D00730    |
| Interactive    | hsa:9970                     | D00506    |
| Interactive    | hsa:9971                     | D00163    |

## Supplementary Information S1. Cont.

| Pair attribute  | Target NRs gene code in KEGG | Drug code |
|-----------------|------------------------------|-----------|
| Non-interactive | hsa:190                      | D00312    |
| Non-interactive | hsa:190                      | D00961    |
| Non-interactive | hsa:190                      | D01689    |
| Non-interactive | hsa:2101                     | D00040    |
| Non-interactive | hsa:2103                     | D00690    |
| Non-interactive | hsa:2104                     | D00316    |
| Non-interactive | hsa:2908                     | D01132    |
| Non-interactive | hsa:5241                     | D00596    |
| Non-interactive | hsa:5241                     | D02217    |
| Non-interactive | hsa:5465                     | D00506    |
| Non-interactive | hsa:5465                     | D00961    |
| Non-interactive | hsa:5468                     | D00279    |
| Non-interactive | hsa:5468                     | D00348    |
| Non-interactive | hsa:5468                     | D00954    |
| Non-interactive | hsa:5915                     | D00279    |
| Non-interactive | hsa:5916                     | D00965    |
| Non-interactive | hsa:6095                     | D00961    |
| Non-interactive | hsa:6096                     | D00182    |
| Non-interactive | hsa:6096                     | D00327    |
| Non-interactive | hsa:6256                     | D00312    |
| Non-interactive | hsa:6256                     | D00565    |
| Non-interactive | hsa:7421                     | D00443    |
| Non-interactive | hsa:8856                     | D02217    |
| Non-interactive | hsa:9970                     | D00182    |
| Non-interactive | hsa:9970                     | D00961    |
| Non-interactive | hsa:9971                     | D00565    |
| Non-interactive | hsa:6095                     | D00585    |
| Non-interactive | hsa:5468                     | D00730    |
| Non-interactive | hsa:3174                     | D00690    |
| Non-interactive | hsa:2100                     | D00565    |
| Non-interactive | hsa:4306                     | D00965    |
| Non-interactive | hsa:7421                     | D00961    |
| Non-interactive | hsa:190                      | D00327    |
| Non-interactive | hsa:9970                     | D00094    |
| Non-interactive | hsa:5468                     | D00898    |
| Non-interactive | hsa:5241                     | D01132    |
| Non-interactive | hsa:6096                     | D00188    |
| Non-interactive | hsa:5241                     | D00211    |
| Non-interactive | hsa:190                      | D00075    |
| Non-interactive | hsa:9970                     | D01294    |
| Non-interactive | hsa:9971                     | D00506    |
| Non-interactive | hsa:9971                     | D01689    |
| Non-interactive | hsa:9971                     | D00965    |
| Non-interactive | hsa:2104                     | D00965    |

## Supplementary Information S1. Cont.

| Pair attribute  | Target NRs gene code in KEGG | Drug code |
|-----------------|------------------------------|-----------|
| Non-interactive | hsa:6096                     | D00627    |
| Non-interactive | hsa:6097                     | D00965    |
| Non-interactive | hsa:4306                     | D00506    |
| Non-interactive | hsa:3174                     | D01387    |
| Non-interactive | hsa:6097                     | D00565    |
| Non-interactive | hsa:2101                     | D00299    |
| Non-interactive | hsa:5468                     | D00565    |
| Non-interactive | hsa:190                      | D00627    |
| Non-interactive | hsa:2101                     | D00965    |
| Non-interactive | hsa:8856                     | D00443    |
| Non-interactive | hsa:5915                     | D00246    |
| Non-interactive | hsa:5468                     | D00327    |
| Non-interactive | hsa:8856                     | D00577    |
| Non-interactive | hsa:9970                     | D00586    |
| Non-interactive | hsa:5916                     | D00961    |
| Non-interactive | hsa:190                      | D00950    |
| Non-interactive | hsa:8856                     | D00040    |
| Non-interactive | hsa:7421                     | D00898    |
| Non-interactive | hsa:6096                     | D00163    |
| Non-interactive | hsa:6097                     | D00690    |
| Non-interactive | hsa:190                      | D02217    |
| Non-interactive | hsa:9970                     | D01441    |
| Non-interactive | hsa:9970                     | D00565    |
| Non-interactive | hsa:2908                     | D00627    |
| Non-interactive | hsa:9971                     | D01161    |
| Non-interactive | hsa:367                      | D02217    |
| Non-interactive | hsa:6097                     | D01294    |
| Non-interactive | hsa:5241                     | D00965    |
| Non-interactive | hsa:5465                     | D00312    |
| Non-interactive | hsa:6095                     | D00211    |
| Non-interactive | hsa:2101                     | D00627    |
| Non-interactive | hsa:6095                     | D00596    |
| Non-interactive | hsa:4306                     | D04066    |
| Non-interactive | hsa:8856                     | D00187    |
| Non-interactive | hsa:6096                     | D00930    |
| Non-interactive | hsa:4306                     | D00279    |
| Non-interactive | hsa:9970                     | D00554    |
| Non-interactive | hsa:7421                     | D00690    |
| Non-interactive | hsa:4306                     | D01161    |
| Non-interactive | hsa:5465                     | D04066    |
| Non-interactive | hsa:190                      | D00187    |
| Non-interactive | hsa:2104                     | D01294    |
| Non-interactive | hsa:190                      | D00067    |
| Non-interactive | hsa:190                      | D00088    |
| Non-interactive | hsa:2100                     | D00211    |
| Non-interactive | hsa:5465                     | D00627    |

## Supplementary Information S1. Cont.

| Pair attribute  | Target NRs gene code in KEGG | Drug code |
|-----------------|------------------------------|-----------|
| Non-interactive | hsa:5468                     | D00040    |
| Non-interactive | hsa:6257                     | D00565    |
| Non-interactive | hsa:7421                     | D00316    |
| Non-interactive | hsa:9970                     | D00965    |
| Non-interactive | hsa:190                      | D01441    |
| Non-interactive | hsa:2100                     | D01689    |
| Non-interactive | hsa:2101                     | D02217    |
| Non-interactive | hsa:3174                     | D04066    |
| Non-interactive | hsa:5465                     | D00246    |
| Non-interactive | hsa:5468                     | D00586    |
| Non-interactive | hsa:5916                     | D01441    |
| Non-interactive | hsa:6095                     | D02217    |
| Non-interactive | hsa:6096                     | D00067    |
| Non-interactive | hsa:6096                     | D00506    |
| Non-interactive | hsa:8856                     | D00279    |
| Non-interactive | hsa:8856                     | D00462    |
| Non-interactive | hsa:9970                     | D00040    |
| Non-interactive | hsa:9970                     | D00163    |
| Non-interactive | hsa:9971                     | D00627    |
| Non-interactive | hsa:5241                     | D00961    |
| Non-interactive | hsa:6256                     | D00961    |
| Non-interactive | hsa:5465                     | D01115    |
| Non-interactive | hsa:6257                     | D00443    |
| Non-interactive | hsa:4306                     | D00690    |
| Non-interactive | hsa:2100                     | D00596    |
| Non-interactive | hsa:8856                     | D00299    |
| Non-interactive | hsa:2101                     | D00094    |
| Non-interactive | hsa:5915                     | D01441    |
| Non-interactive | hsa:2101                     | D00951    |
| Non-interactive | hsa:2101                     | D01217    |
| Non-interactive | hsa:6097                     | D00961    |
| Non-interactive | hsa:190                      | D00956    |
| Non-interactive | hsa:5468                     | D01115    |
| Non-interactive | hsa:2103                     | D01387    |
| Non-interactive | hsa:6257                     | D00965    |
| Non-interactive | hsa:6097                     | D01441    |
| Non-interactive | hsa:6096                     | D01161    |
| Non-interactive | hsa:6096                     | D00143    |
| Non-interactive | hsa:6095                     | D00565    |
| Non-interactive | hsa:7421                     | D00211    |
| Non-interactive | hsa:9971                     | D04066    |
| Non-interactive | hsa:9971                     | D00182    |
| Non-interactive | hsa:2908                     | D00586    |
| Non-interactive | hsa:5915                     | D01161    |
| Non-interactive | hsa:2103                     | D00730    |

## Supplementary Information S1. Cont.

| Pair attribute  | Target NRs gene code in KEGG | Drug code |
|-----------------|------------------------------|-----------|
| Non-interactive | hsa:8856                     | D00585    |
| Non-interactive | hsa:6097                     | D00187    |
| Non-interactive | hsa:5468                     | D00182    |
| Non-interactive | hsa:3174                     | D00187    |
| Non-interactive | hsa:8856                     | D04066    |
| Non-interactive | hsa:2908                     | D00554    |
| Non-interactive | hsa:2101                     | D01161    |
| Non-interactive | hsa:2100                     | D00143    |
| Non-interactive | hsa:2103                     | D00961    |
| Non-interactive | hsa:6257                     | D00586    |
| Non-interactive | hsa:190                      | D00316    |
| Non-interactive | hsa:5465                     | D01132    |
| Non-interactive | hsa:6096                     | D00246    |
| Non-interactive | hsa:5241                     | D00105    |
| Non-interactive | hsa:5914                     | D01294    |
| Non-interactive | hsa:6257                     | D00182    |
| Non-interactive | hsa:5465                     | D00954    |
| Non-interactive | hsa:6097                     | D00088    |
| Non-interactive | hsa:5241                     | D00163    |
| Non-interactive | hsa:6097                     | D01689    |
| Non-interactive | hsa:9971                     | D02367    |
| Non-interactive | hsa:5916                     | D00554    |
| Non-interactive | hsa:2103                     | D01217    |
| Non-interactive | hsa:2908                     | D00067    |
| Non-interactive | hsa:6256                     | D00596    |
| Non-interactive | hsa:5916                     | D02217    |
| Non-interactive | hsa:2099                     | D00690    |
| Non-interactive | hsa:5916                     | D00627    |
| Non-interactive | hsa:5468                     | D00094    |
| Non-interactive | hsa:2103                     | D00088    |
| Non-interactive | hsa:2101                     | D00462    |
| Non-interactive | hsa:6095                     | D00962    |
| Non-interactive | hsa:5914                     | D00961    |
| Non-interactive | hsa:6256                     | D01115    |
| Non-interactive | hsa:9970                     | D00730    |
| Non-interactive | hsa:3174                     | D00312    |
| Non-interactive | hsa:5465                     | D00462    |

**Supplementary Information S2.** The fingerprints for the 53 different drug codes occurring in Online Supporting Information S1. Each of these fingerprints is a 256-D vectors generated by the OpenBabel software downloaded from <http://openbabel.org/> (Open Babel). See the text of the main paper for further explanation.

>D05341

```
00010000 01000000 00000000 00000000 00080000 00000000 00000000 00000000
00000000 00000000 00000000 40001000 04008008 00800000 00000000 00080008
00000000 00000000 00402000 00000001 00000000 00000a00 01000000 00000010
00000000 00000000 00000000 00000000 00000000 00000000 00020000 00000000
```

>D04066

```
00048000 63000008 6000010a 00010600 00081000 40000202 02040000 00000001
04000a00 00080840 08300000 40008000 00008a02 20a00000 01010021 001a0008
a0020200 02000100 02482000 00020201 00000100 08000d10 11004000 00402018
00000000 88010023 00120000 00000000 00000202 01060003 80020000 10020600
```

>D02367

```
00000000 81000020 00000000 00000000 00492000 00000000 00000000 00000402
00004000 00100000 00000080 40400000 00020000 00800004 00000400 00090008
00000000 00000020 02402000 00000001 00000008 00000000 01008000 00000010
00200000 00000000 00604000 80000000 00000000 01000200 24020800 00000000
```

>D02217

```
1c012000 11000809 2010090b 80010602 00181080 00808000 02040480 29100008
00400000 008808c1 08200200 d0018280 0080803a 02200081 21083181 00080008
10020000 82000008 04000000 00024201 00000000 58860a88 32004090 00500014
02804002 a4000010 00130000 50000645 020042a8 00060002 80000000 00c30e00
```

>D01689

```
00010002 81000020 00000508 00c90300 40280000 04400000 00007880 0a000402
01202000 00100020 00100000 4000d000 04028028 02800000 00000410 00280008
00820040 80000020 1241a000 00122001 00100001 00000b80 05008040 08000810
00200000 20000000 00404000 a4000000 00000200 01000002 24220000 02020000
```

>D01441

```
0001e202 00010800 80004100 44550610 09041004 04004000 00002800 02081200
00000100 00010840 00282004 6000d810 82008802 0010a002 80020440 800c0004
00060000 12006004 0c600000 10a00006 40100000 2c02a600 31812860 0240011c
000c0003 c0180000 08000600 800110e0 08c0810c 00460801 c0040800 200102a2
```

>D01387

```
00010042 81400020 00100100 00491300 403c1440 04200004 00000880 0a000402
01200000 01100020 00100000 4000d000 14028028 02800000 00000410 08289008
00820000 80000020 1341a000 00022001 00000021 10000a80 05008000 08520814
00200400 00000002 00404020 b4000020 00000200 0300000a 24a20000 02000200
```

>D01294

```
00000000 01000020 00400100 00010300 00582000 00000800 02000000 08000402
00004000 00100008 40000080 40008000 00028000 00800004 00000400 00091008
00820000 00000020 22402010 00000001 00000028 00000a00 01008000 00000010
00201400 00000500 00404000 80000008 00000200 01000202 24020800 00800010
```

>D01217

```
00010000 01040020 00000000 00000000 40000000 00000001 00000080 00000402
01004000 00108000 00000000 40001000 04028008 20000004 00000400 00000004
00000000 00000020 02092080 00000001 00000000 00000280 00008000 00000012
00200000 00000000 00404200 80000000 00000000 01000000 24020000 00000000
```

>D01161

00000000 67000008 20100102 00110200 00080000 40000082 02000000 00000001  
05200800 00084840 08100000 40128000 00010002 00a40000 80000020 00080008  
04000200 02000000 02402000 00020201 40000100 08000001 01004300 00f40010  
00000000 80020001 00120020 90000000 0000000a 03020022 00020000 01010620

>D01132

10000202 00821a00 00024902 511d0290 0044b033 00004020 00400000 00000000  
14800900 000a4851 08510004 60028000 08218800 00050000 02020480 0a0c400c  
04020000 02000004 00214010 00000011 e0000101 08849a40 21800121 0240001d  
00262404 80042000 48088040 04000001 04400204 00030072 d0000000 01018420

>D01115

00050040 81000020 00000900 80010300 00280080 00000000 00000280 00000402  
01004000 00108008 00040200 40009000 04028028 02800004 00080404 00081008  
00820000 00000120 12412000 0200a001 00000020 00001a80 0100a000 00000010  
00200400 00000000 00404000 80000000 00000200 81000002 24020000 00000000

>D00965

00014006 01003810 40100120 00010e00 24000000 80000000 00000c04 00002009  
14000000 00000a70 04280004 4000b004 04019080 09102000 20120140 00000010  
00040000 02402000 08000000 00000011 48120100 38050600 20022000 0040001a  
00140000 c0000000 00000000 900000a0 0a408000 00060001 20104000 04004200

>D00962

04052000 01000008 20000108 00010602 00281080 00008000 82040080 09000400  
00400000 000a0841 08200100 5000d000 14808022 02000000 01001003 00080008  
10000400 02000000 01400010 00020001 00000000 18040b80 17000001 00400010  
00000000 a8000000 00522000 40000001 0040028a 00060002 04000000 00020600

>D00961

00004002 04808a00 40121100 02910640 241000a0 00000010 00004c00 00000000  
00000000 00804850 20683004 6100d024 00118000 01349000 82220040 00080008  
04440000 02000000 08804000 00402010 c4100010 18000602 22802680 08540019  
08042200 80000000 08000000 90000081 00408000 00068421 10100000 05010220

>D00956

00010040 01000028 00000100 00010300 00080000 00000000 00000080 00000402  
01004800 00188840 08100000 40009000 04028008 00800004 00000400 00081008  
00820000 02000020 02412008 00000001 00000120 08000a80 01008040 00400010  
00200c00 80000000 00404000 80000000 00000200 01020002 24020000 00000400

>D00954

00010000 01000020 00000000 00000000 00482000 00000000 00000080 00000402  
01004000 00108000 00000080 40001000 04028008 00800004 00000400 00090008  
00000000 00000020 02412000 00000001 00000008 00000280 01008000 00000010  
00200000 00000000 00404000 80000000 00000000 01000200 24020800 00000000

>D00951

00010000 01000020 00000100 00010300 00080000 00000000 00000080 00000402  
01004000 00108000 00000000 4000d000 04028008 00800004 00000400 00081008  
00820000 80000020 02412000 00000001 00000020 00000a80 01008000 00000014  
00200400 00000000 00404000 80000000 00000200 01000002 24020000 02000000

>D00950

00010000 01000020 00000000 00000000 00482000 00000000 00000080 00000402  
01004000 00108000 00000080 40001000 04028008 00800004 00000400 00090008  
00000000 00000020 02412000 00000001 00000008 00000280 01008000 00000010  
00200000 00000000 00404000 80000000 00000000 01000200 24020800 00000000



>D00930

00000000 01040000 00000800 00000000 40080000 00000001 00000000 00000402  
00000000 00100008 00000200 40000000 00020000 02800000 00000404 0008000c  
00000000 00000000 03402080 00000001 00000000 00000000 01008000 00000012  
00200000 00000000 00404000 80000000 00000000 01000000 24020000 04000000

>D00898

00000000 00040008 20000100 00010200 00000000 00800001 82000081 00000400  
00000800 00980840 08100000 40008000 00000002 00000000 00000002 00000008  
00000400 02100000 00000080 00020801 00000100 08100000 00008001 00400010  
00000000 80000000 00522000 40000000 00400000 00020002 04000000 00000500

>D00730

00000002 00000800 00000100 80090300 00000010 00004000 00000000 00000000  
00000100 00000840 00000004 40008000 00008000 00010000 00000040 02081008  
00020000 02000000 00400000 00000001 40000020 08020a20 21000000 00400014  
00000400 80002000 00080000 00000000 00000200 00060002 c0000000 02000000

>D00690

001b0002 81200820 00080101 00490300 40380010 04004000 00000080 02200402  
03004100 02100000 00102520 4000f000 46028428 00810000 80000430 02081008  
00824000 82002020 12412000 00022101 00000021 88040b80 0100a000 04480a14  
20200440 28002000 04484010 88000008 00800285 01020002 e4024000 02822800

>D00627

0800e00a 00800a01 00101500 10050610 000c0061 0000c000 00000000 00081000  
80500100 100018d0 0110800c 40818800 82009880 00608000 200300c0 020c000c  
00020000 06802004 04680008 50410005 c0100008 38028a30 31880041 81500414  
00040000 c0000000 00000040 00000040 0440400c 00c60c08 c00c0804 200004a0

>D00596

04006002 00001328 20107308 00110606 00051080 00000800 02040000 00000400  
01400800 230948c1 08340005 40009300 0481b802 000c0000 01001001 000c000c  
04040410 02004200 08210018 00a20101 40120108 1c048e04 32800900 02600018  
00001800 80001020 08520080 140000c0 00008208 0006081b 04005010 83010600

>D00586

00004002 00001810 40100100 00010600 24000000 80000000 00000c00 00000000  
14000000 00000870 04280004 40009004 00018080 01100000 20120140 00000010  
00040000 02000000 08000000 00000010 48120000 18040600 20002000 00400010  
00040000 c0000000 00000000 900000a0 02408000 00060001 00100000 04000200

>D00585

00010202 01040820 00000102 40010200 40482000 00800001 00200081 00000402  
01004800 00988848 08300084 40009008 04028008 20a08004 00000442 0009000c  
00040000 02100020 0a692080 02000801 40000108 08000280 21008800 00400012  
00200000 80000000 00404200 80000080 00008002 81060202 24020804 00000400

>D00577

00000000 00000008 20000300 00010200 00000000 00000000 82000080 00000402  
00000800 00180840 08100100 40008000 00000002 00000000 00000002 00000008  
00000400 02000000 00000000 00020001 00000100 18000000 00008001 00400010  
01000000 80000000 00522000 40000000 00400000 00020002 04000000 00000400

>D00565

04008000 00000808 20000109 00010200 00001000 00000000 02040000 01000040  
00002000 00080840 08040000 4000d800 02808026 00000000 01200001 00080008  
00020000 82000000 00000002 00020000 00000020 08020b00 05000000 08400014  
00002400 a0000000 00160008 40800020 00000280 00020002 80000000 00020400

>D00554

00000000 63000008 20000102 00010200 00482000 40000002 02000000 00000001  
 00000800 00080840 08100080 40008000 00000002 00a00000 00000020 00090008  
 00000200 02000000 02402000 00020201 00000108 08000000 01004000 00400010  
 00000000 80000001 00120000 00000000 00000002 01020202 00020800 00000400

>D00506

00000000 01001000 00100100 00010e00 00000000 00000000 00000004 00002004  
 00000900 000809c0 08300000 40009000 0d009000 00000000 40000000 00000000  
 00000008 02000001 00000010 00000001 00020100 182d0600 00000000 81400018  
 00012000 80000000 00000000 10000000 04000000 00060213 00082000 00000600

>D00462

00010040 01000000 00000100 00010300 80080000 00000000 00000000 00000000  
 00000000 00000000 00000000 40009000 04008028 00800000 00000000 00081008  
 00820000 00000000 02402000 00000001 00000020 00000a00 01000000 00000010  
 00000400 00000000 00000000 00000000 00000200 01000002 00020000 00000000

>D00443

00050040 01000120 00010100 00110304 00080002 00000000 00000081 00000402  
 05a04000 0010c001 00000000 40029100 04038008 00840004 00080400 00081008  
 04820000 000000a0 02412000 00100801 40000020 00000a80 01008300 00200010  
 00200400 00000000 04404000 80000000 00000200 01001822 24020000 81010000

>D00348

00000400 01040020 00000000 00000000 40000000 00000001 00000000 00000402  
 01004000 00100000 00000000 40000000 00028000 20020004 00000400 0008000c  
 00000000 00000020 02092090 00000001 00000000 00000a00 00408000 00000012  
 00201000 00000000 00404000 80000000 00000000 00000000 24820000 00000000

>D00327

00010000 81400020 00100000 00001000 00281400 00000000 00000080 00000402  
 01004000 00108000 00000000 40001000 04028008 00800004 00000400 00080008  
 00000000 00000020 02412000 00002001 00000000 00000280 01008000 00520010  
 00200000 00000002 00404020 90000000 00000000 03000000 24020000 00000200

>D00316

00080400 40040008 20000308 00010200 42001001 00000001 82040080 00000400  
 01000100 00100840 40000000 40008000 00008002 20220000 01000003 0008200c  
 00020400 02400000 20090090 00020200 00100010 08000a00 00408001 00400010  
 01001400 80000000 00422000 40000000 00404340 08220000 04800000 01000010

>D00312

00010000 63020008 20000302 00410200 20000020 40002002 82000000 00002801  
 00000800 00880840 08102000 40809000 0400800a 00200002 00000020 00080008  
 02000a00 02000000 02802000 00020201 00000100 08000200 00004010 00400011  
 00100000 80000001 00120000 00000000 00000002 01020402 00020000 00010c20

>D00299

00000000 01040000 00000000 00000000 40080000 00000001 00000000 00000402  
 00000000 00100008 00000200 40000000 00020000 00800000 00000404 0008000c  
 00000000 00000000 02402080 00000001 00000000 00000000 01008000 00000012  
 00200000 00000000 00404000 80000000 00000000 01000000 24020000 04000000

>D00279

04008000 00000008 20000008 00010200 00001000 00000000 02000000 00000040  
 00002000 00000840 00040000 4000d800 02808006 00000000 01200001 00080008  
 00020000 80000400 00000002 00020000 00000020 08000b00 05000000 08000010  
 00002400 00000000 00100008 00800020 00000200 00020000 00000000 00020000

>D00246

00010042 81000020 00000000 00490100 403c0040 04200004 00000880 0a000402  
 01200000 01100020 00100000 4000d000 14028028 02800000 00000410 08289008  
 00800000 80000020 1341a000 00022001 00000021 00000280 05008000 08000814  
 00200400 00000000 00404000 a4000020 00000200 01000000 24a20000 00000000

>D00211

0400520f c3048808 20910109 d4010781 70485041 42020041 42430000 03045642  
 01210b00 11580849 483c021c 6000d9f8 8082c022 22912000 030e0445 3838701e  
 28860084 b6008101 0d496c90 00022e01 401c4120 38030e88 6104a020 02408016  
 00004420 80400a00 605f4858 a0401084 0945c358 000e020b e402a400 06010618

>D00188

00000400 81040000 00000000 00000000 40080000 00000001 00000000 00000400  
 00000000 00100008 00000200 40000000 00020000 00800000 00000404 0008000c  
 00000000 00000000 02402080 00000001 00000000 00000000 01008000 00000012  
 00000000 00000000 00404000 80000000 00000000 01000000 24820000 04000000

>D00187

00000400 81040000 00000000 00000000 40080000 00000001 00000000 00000402  
 00000000 00100008 00000200 40000000 00020000 00800000 00000404 0008000c  
 00000000 00000000 02402080 00000001 00000000 00000000 01008000 00000012  
 00200000 00000000 00404000 80000000 00000000 01000000 24820000 04000000

>D00182

00010000 01000020 00000000 00000000 00482000 00000000 00000080 00000402  
 01004000 00108000 00000080 40001000 04028008 00800004 00000400 00090008  
 00000000 00000020 02412000 00000001 00000008 00000280 01008000 00000010  
 00200000 00000000 00404000 80000000 00000000 01000200 24020800 00000000

>D00163

00010000 01000000 00000000 00000000 00080000 00000000 00000000 00000000  
 00000000 00000000 00000000 40001000 04008008 02800000 00000000 00080008  
 00000000 00000000 02402000 00000001 00000000 00000a00 01000000 00000010  
 00000000 00000000 00000000 00000000 00000000 01000000 00020000 00000000

>D00143

00010000 01000020 00000800 00000000 00080000 00000000 00000000 00000402  
 00004000 00100008 00000200 40001000 04028008 00800004 00000404 00080008  
 00000000 00000020 02402000 00000001 00000000 00000200 01008000 00000010  
 00200000 00000000 00404000 80000000 00000000 01000000 24020000 00000000

>D00105

00000000 63000008 20000102 00010200 00080000 40000002 02000000 00000001  
 00000800 00080840 08100000 40008000 00000002 00a00000 00000020 00080008  
 00000200 02000000 02402000 00020201 00000100 08000000 01004000 00400010  
 00000000 80000001 00120000 00000000 00000002 01020002 00020000 00000400

>D00094

00000400 01040020 00000000 00000000 40000000 00000001 00000000 00000402  
 01004000 00100000 00000000 40000000 00028000 20020004 00000400 0008000c  
 00000000 00000020 02092090 00000001 00000000 00000a00 00408000 00000012  
 00201000 00000000 00404000 80000000 00000000 00000000 24820000 00000000

>D00088

00010000 81000020 00000000 00000000 00280000 00000000 00000080 00000402  
 01004000 00108000 00000000 40005000 04028028 00800004 00000400 00080008  
 00000000 00000020 03412000 00002001 00000000 00000280 01008000 00000010  
 00200000 00000000 00404000 80000000 00000000 01000000 24020000 00000000

```
>D00075
00010000 01000020 00000000 00000000 00080000 00000000 00000080 00000402
01004000 00108000 00000000 40001000 04028008 00800004 00000400 00080008
00000000 00000020 02412000 00000001 00000000 00000280 01008000 00000010
00200000 00000000 00404000 80000000 00000000 01000000 24020000 00000000
```

```
>D00067
00010000 63000008 20000102 00010200 00000000 40000002 02000000 00000001
00000800 00080840 08100000 40009000 0400800a 00200000 00000020 00080008
00000200 02000000 02002000 00020201 00000100 08000200 00004000 00400010
00000000 80000001 00120000 00000000 00000002 01020002 00020000 00000400
```

```
>D00066
00010000 01000020 00000000 00000000 00000000 00000000 00000080 00000402
01004000 00108000 00000000 40001000 04028008 00000004 00000400 00000000
00000000 00000020 02012000 00000001 00000000 00000280 00008000 00000010
00200000 00000000 00404000 80000000 00000000 01000000 24020000 00000000
```

```
>D00040
00000000 01000020 00000800 00000000 00080000 00000000 00000000 00000402
00004000 00100008 00000200 40000000 00020000 00800004 00000404 00080008
00000000 00000020 02402000 00000001 00000000 00000000 01008000 00000010
00200000 00000000 00404000 80000000 00000000 01000000 24020000 00000000
```

**Supplementary Information S3.** The protein sequences for the 25 different nuclear receptors occurring in Supplementary Information S1.

```
>hsa:2099
MTMTLHTKASGMALLHQIQGNELEPLNRPQLKIPLERPLGEVYLDSSKPAVYNYPEGAAY
EFNAAAAANAQVYGQTGLPYGPGSEAAAFGSNGLGGFPPLNSVSPSPLMLLHPPPQLSPF
LQPHGQQVPIYLENEPSGYTVREAGPPAFYRPNSDNRRQGGRELASTNDKGSMMAMESAK
ETRYCAVCNDYASGYHYGVWSCEGCKAFFKRSIQGHNDYMCNATNQCCTIDKNRRKSCQAC
RLRKCCEYEVGMKGGIRKDRRGGRRMLKHKRQRDDGEGRGEVGSAGDMRAANLWPSPLMIKR
SKKNSLALSLTADQMVSALLDAEPPILYSEYDPTRFSEASMMGLLTNLADRELVHMINW
AKRVPVGFVDLTLHDQVHLLLECAWLEILMIGLVWRSMHEHPGKLLFAPNLLLDNRNQGKCEG
MVEIFDMLLATSSRFMMNLQGEFVCLKSIILLNSGVYTFLSSTLKSLEEKDHIHRVLD
KITDTLIHLMKAGLTLQQQHQLAQLLLILSHIRHMSNKGMEHLYSMKCKNVVPLYDLL
LEMLDAHRLHAPTSRGGASVEETDQSHLATAGSTSSHSLQKYYITGEAEGFPATV
```

```
>hsa:190
MAGENHQWQGSILYNMLMSAKQTRAAPEAPETRLVDQCWGCSCGDEPGVGREGLLGRNV
ALLYRCCFCGKDHPRQGSILYSMLTSAKQTYAAPKAPEATLGPCWGCSCGSDPGVGRAGL
PGGRPVALLYRCCFCGEDHPRQGSILYSLTSSKQTHVAPAAPEARPGGAWWDRSYFAQR
PGGKEALPGGRATALLYRCCFCGEDHPQOGSTLYCVPTSTNQAQAAPPEARPRAPWWDTS
GALRPVALKSPQVVCEAASAGLLKTLRFVKYLPFCFQVLPDQQLVLRNCWASLLMLELA
QDRLQFETVEVSEPSMLQKILTRRRETGGNEPLVPPTLQHHLAPPAEARKVPSASQVQA
IKCFLSKCSLNIISTKEYAYLKGTVLFPDVPGLQCVKYIQGLQWGTQQILSEHTRMTHQ
GPHDRFIELNSTLFLLRFINANVIAELFFRPIIGTVSMDDMMLEMLCTKI
```

```
>hsa:2100
MDIKNSPSSLNSPSSYNCSQSILPLEHGSIIYIPSSYVDSHHEYPAAMTFYSPAVMNYSIPI
NVTNLEGGPGRQTTSPNVLWPTPGHLSPLVVHRQLSHLYAEPQKSPWCEARSLEHTLPVN
RETLKRKVSIGNRCASPVTPGSGKRDAHFCAVCSYASGYHYGVWSCEGCKAFFKRSIQGH
NDYICPATNQCCTIDKNRRKSCQACRLRKCCEYEVGMVKCGSRRERCYRLVRRQRSADQLH
CAGKAKRSGGHAPRVRELLLDALSPEQLVLTLLLEAEPPHVLISRPSAPFTEASMMMLTK
LADKELVHMISWAKKIPGFVELSLFDQVRLLESWMEVLMGLMWRSIDHPGKLI FAPDL
VLDREGEKCEVEGILEIFDMLLATTSRFRELKQLQKEYLCKVAMILLNSSMYPLVTATQDA
DSSRKLAAHLLNAVTDALVWVIAKSGISSQQQSMRLANLLMLLSHVRHARA EKASQTLTSP
GMKMETLLPEATMEQ
```

>hsa:2101

MSSQVVGIEPLYIKAEPASPDSPKGSSETETEPVALAPGPAPTRCLPGHKEEEDGEGAG  
 PGEQGGGKLVLSLSPKRLCLVCGDVASGYHYGVASCEACKAFFKRTIQGSI EYSCPASNE  
 CEITKRRRKACQACRFTKCLRVGMLKEGVRLDRVRGGRQKYKRRPEVDPLPFPGPFAGP  
 LAVAGGPRKTAAPVNALVSHLLVVEPEKLYAMPDPAGPDGHLPAVATLCDLFDREI VVTI  
 SWAKSIPGFSSLSLSDQMSVLQSVWMEVLVLGVAQRSLPLQDELAF AEDLVLDDEGARAA  
 GLGELGAALLQLVRRQLALRLEREEYVLLKALALANSDSVHI EDAAEAVEQLREALHEALL  
 EYEAGRAGPGGGAERRRAGRLLLLTLP LLRQTAGKVL AHFYGVKLE GKVPMHKL FLEMLEA  
 MMD

>hsa:2103

MSSDRHLGSSCGSFIKTEPSSPSSGIDALSHHSPSGSSDASGGFGLALGTHANGLDSDPP  
 MFAGAGLGGTPCRKSYEDCASGIMEDSAIKCEYMLNAIPKRLCLVCGDIASGYHYGVASC  
 EACKAFFKRTIQGNI EYSCPATNECEITKRRRKSCQACRFMKCLKVGMLKEGVRLDRVRG  
 GRQKYKRRLDSESSPYLSLQISPPAKKPLTKIVSYLLVAEPDKLYAMPPPGMPEGDIKAL  
 TTLCDLADRELVVIIGWAKHIPGFSSLSLGDQMSLLQSAWMEILILGIVYRSLPYDDKLV  
 YAEDYIMDEEHSRLAGLLELYRAILQLVRRYKCLKVEKEEFVTLKALALANSDSMYIEDL  
 EAVQKQLDQLLHEALQDYELSRHEEPWRTGKLLLLTLP LLRQTAAKAVQHFYSVKLQ GKVP  
 MHKLFLEMLEAKVGEQLRGS PKDERMSSHDGKCPFQSA AFTSRDQSNSPGIPNPRPSSP  
 TPLNERGRQISPSTRTPGGQ GKHLWLTM

>hsa:2104

MSNKDRHIDSSCSSFIKTEPSSPASLTDVSNHHSPPGSSDASGSYSSTMNGHQ NGLDSDPP  
 LYPSAPILGGSGPVRKLYDDCSSTIVEDPQTKCEYMLNSMPKRLCLVCGDIASGYHYGVA  
 SCEACKAFFKRTIQGNI EYSCPATNECEITKRRRKSCQACRFMKCLKVGMLKEGVRLDRV  
 RGGRQKYKRRIDAENSPYLN PQLVQPAKKPYNKIVSHLLVAEPEKIYAMPDPTVPDS DIK  
 ALTTLCDLADRELVVIIGWAKHIPGFSTLSLADQMSLLQSAWMEILILGVVYRSL SFEDE  
 LVYADDYIMDEDQSKLAGL LLDLNNAILQLVKKYKSMKLEKEEFVTLKAIALANSDSMHIE  
 DVEAVQKQLDVLHEALQDYEAGQHMEDPRRAGKMLMTLP LLRQTSTKAVQHFYNIKLE GK  
 VPMHKL FLEMLEAKV

>hsa:2908

MDSKESLTPGREENPSSVLAQERGDVMDFYKTLRGGATVKVSASSPSLAVASQSDSKQRR  
 LLVDFPKGSVSNAAQPPDL SKAVLSMGLYMGETETKVMGNDLGF PQQGQISLSSGETDLK  
 LLEESIANLNRSTV PENPKSSASTAVSAAPEKEFPKTHSDVSSEQQHLKGQTGTNGGN  
 VKLYTTDQSTFDILQDLEFSSGSPGKETNESPWRSDDLIDENCLLSPLAGEDDSFLLEGN  
 SNEDCKPLILPDTKPKIKDNGDLVLS SPSNVTL PQVKTEKEDFIELCTPGVIKQEKLGTV  
 YCQASFPGANIIGNKMSAISVHGVSTSGGQMYHYDMNTASLSQQQDQKPIFNVI PPI PVG  
 SENWNR CQSGDDNLTSLGTLNFPGRTVFSNGYSSPSMRPDVSSPPSSSSTAT TGPPPKL  
 CLVCSDEASGCHYGVLTCGSCKVFFKRAVEGQHNYLCAGRND CIDKIRRNKNC PACRYRK  
 CLQAGMNLEARKTKKKIKGIQQATTGVSQETSENPGNKTIVPATLPQLTPTLVSLLEVIE  
 PEVLYAGYDSSVPDSTWRIMTTLNMLGGRQVIAAVKWAKAIPGFRNLHLDDQMTLLQYSW  
 MFLMAFALGWRSYRQSSANLLCFAPDLIINEQRMTLPCMYDQCKHMLYVSSSELHRLQVSY  
 BEYLCMKTL LLLSSVPKDG LKSQELFDEIRMTYIKELGKAI VKREGNSSQNWR FYQLTK  
 LLDSMHEVVENLLNYCFQTF LDKTMSIEFPEMLAEIITNQIPKYSNGNIKKLLFHQK

>hsa:3174

MDMANYSEVLDPTYTTLEFETMQILYNSDSSAPETSMNTTDNGVNCLCAICGDRATGKH  
 YGASSCDGCKGFFRRSIRKSHVYSCRFSRQCVVDKDKRNQCRYCRLRKCFRAGMKKEAVQ  
 NERDRISTRSTFDGSNI PSINTLAQAEVRSRQISVSSPGSSTDINVKKIASIGDVCESM  
 KQQLLVLEWAKYIPAFCELP LDDQVALLRAHAGEHLLL GATKRSMYKDI LLLGN NYVI  
 HRNSCEVEISRVANRVLDELVRPFQEI QIDDNEYACLKAI VFFDPDAKGLSDPVKIKNMR  
 FQVQIGLEDYINDRQYDSRGRFGELLLLLLPTLQSITWQMIEQIQFVKLFGMVKIDNLLQE  
 MLLGGASNDGSHLHHPHLSQDPLTGQTILLGPMSTLVHADQISTPETPLPSPPPQSGS  
 QEYKIAANQASVISHQHLSKQKQL

>hsa:367

MEVQLGLGRVYPRPPSKTYRGAFQNL FQSVREVIQNPGRHP EAASAAPP GASLLLLQQQ  
 QQQQQQQQQQQQQQQQQQETS PRQQQQQQGEGD GSPQAHRRGPTGYLVLD EEQQPSQPQ  
 SALECHPERGCVPEPGA AVAASKGLPQQLPAPPDEDDSAAPSTLSLLGPTFPGLSSCSAD  
 LKDI LSEASTMQLLQQQQQEA VSEGSSSGRAREASGAPTSSKDNYLGGTSTISDNAKELC  
 KAVSVSMGLGVEALEHLSPEGEQLRGDCMYAPLLGVPPAVRPTPCAPLAECKGSLD DSAG  
 KSTEDTAEYSPFKGGYTKGLEGESLGCSGSAAAGSSGTLELPSTLSLYKSGALDEAAAYQ  
 SRDYNFPLALAGPPPPPPPHARIKLENPLDYGS AWAAAAAQCRYGD LASLHGAGAA  
 GPGSGSPSAAASSWHTLFTAEEGQLYGPCGGGGGGGGGGGGGGGGGGGGGGEAGAVAP  
 YGYTRPPQGLAGQESDFTAPDVWYPGGMVSRVPYPSPTCVKSEMGPWMDSYSGPYGDMRL  
 ETARDHVLPIDYFFPQKTCLICGDEASGCHYGALTCGSCCKVFFKRAAEGKQKYL CASRN  
 DCTIDKFRRNKNCPSRLRKC YEAGMTLGARKLKKLGNLKLQE EGEASSTTSPT EETTQKL

TVSHIEGYEQPIFLNVLEAIEPGVVCAGHDNNQPDFAALLSSLNELGERQLVHVVKWA  
KALPGFRNLHVDDQMAVIQYSWMGLMVFAMGWRSTNVNSRMLYFAPDLVFNEYRMHKS  
MYSQCVRMRHLSQEFGLQITPQEFCLCMKALLLSIIPVDGLKNQKFFDELRMNYIKEL  
RIIACKRKNPTSCSRRFYQLTKLLDSVQPIARELHQFTFDLLIKSHMVSVDFFEMMAEII  
SVQVPKILSGKVKPIYFHTQ

>hsa:4306

METKGYHSLPEGLDMERRWGQVSQAVERSSLGPTERTDENNYMEIVNVSCVSGAIPNNST  
QGSSKEKQELLPLCQQDNNRPGILTSDIKTELESKELSATVAESMGLYMDSVRDADYSYE  
QQNQQGSMPAKIYQNEQLVKFYKGNHRPSTLSCVNTPLRSFMSDSGSSVNGGVMRAV  
VKSPIMCHEKSPSVCPLNMTSSVCSFAGINSVSSTTASFGSFPVHSPITQGTPLTCS  
PNVENRGRSRHSPAHASNVGSPSSPLSSMKSSISSPPSHCSVKSPVSSPNNVTLRSSVSSP  
ANINNSRCSVSSPNTNNRSTLSSPAASTVGSICSPVNNAFSYTASGTSAGSSTLRDVVP  
SPDTQEKGAQEVFPKTEEVESAISNGVTGQLNIVQYIKPEPDGAFSSSSCLGGNSKINS  
DSSFSVPIKQESTKHSCSGTSFKGNPTVNPFFPMDGSYFSFMDDKDYSLSGILGPPVPGF  
DGNCEGSGFPVGIKQEPDDGSYPEASIPSSAIVGVNSGGQSFHYRIGAQGTISLSRSAR  
DQSFQHLSSFPVNTLVESSWKSHGDLSSRRSDGYPVLEYIPENVSSSTLRVSTGSSRPS  
KICLVCGDEASGCHYGVTTCGSCVKVFFKRAVEGQHNYLCAGRNDICIDKIRRNKCPACRL  
QKCLQAGMNLGARKSKKLGKLGKIHHEEQPQQQPPPPPPPPQSPPEEGTTYIAPAKEPSVN  
TALVPQLSTISRALTSPVMVLENIPEPIVYAGYDSSKPDTAENLLSTLNRLAGKQMIQV  
VKWAKVLPGFKNLPLEDQITLIQYSWMCLSSFALSWRSYKHTNSQFLYFAPDLVFNEEK  
MHQSAMYELCQGMHQISLQFVRLQLTFEEYTIMKVLLLLSTIPKDGLKSQAAFEEMRTNYI  
KELRKMVTKCPNNSGQSWQRFYQLTKLLDSMHDLVSDLLEFCFYTFRESHALKVEFPAML  
VEIISDQLPKVESGNAPLYFHRK

>hsa:5241

MTELKAKGPRAPHVAGGPPSPEVGSPLLCPAAGPFPGSQTSDTLPEVSAIPIISLDGLLF  
PRPCQGQDPSDEKTQDQQLSDVEGAYSRAEATRAGAGSSSSPPEKDSGLLDSVLDTLA  
PSGPGSQSPSPACEVTSWCLFGPELPEPPAAPATQRVLSPLMSRSGCKVGDSSGTAA  
AHKVLPRGLSPARQLLLPASEPHWSGAPVKPSPQAAAVEVEEEDGSESEESAGPLLKKGK  
PRALGVAAGGAAAVPPGAAAGGVALVPKEDSRFSAPRVALVEQDAPMAPGRSPLATTV  
MDFIHPILPLNHALLAARTRQLLEDESVDGGAGAASAFAPPRSSPCASSTPVAVGDFPD  
CAYPPDAEPKDDAYPLYSDFPQPPALKIKEEEEGAEASARSPRSYLVAGANPAAFPDPPLG  
PPPLPPRATPSRPGEAATAAPASASVSSASSSGSTLECIKYAEGAPPQQGPFAPPPC  
KAPGASGCLLPRDGLPSTASAAAAGAALYPALGLNGLPQLGYQAAVLKEGLPQVYPP  
YLNLYLRPDEASQSPQYSFESLPQKICLICGDEASGCHYGVLTCGSCVKVFFKRAMEGQHN  
YLCAGRNDICIVDKIRRNKCPACRLRKCQAGMVLGGRKFKKFNKVRVVRALDAVALPQPV  
GVPNESQALSQRFTFSPGQDIQLIPPLINLLMSIEPDVIYAGHDNTKPDTSSSLLTSLNQ  
LGERQLLSVVKSSKSLPGFRNLHIDDQITLIQYSWMSLMVFLGWRSYKHVSGQMLYFAP  
DLILNEEQMKESSFLSCLTMWQIQEFVQLQVSSQEEFLCMKVLNLLNTIPLLEGLRSQT  
FEEMRSSYIRELIKAIGLRQKGVVSSQRFYQLTKLLDNLDLHDLVKQLHLHLYCLNTFIQSRA  
LSVEFPMMSEVIAAQLPKILAGMVKPLLFHKK

>hsa:5465

MVDTESPLCPLSPLAAGDLESPLSEEFLOEMGNIQEIISQSIGEDSSGSFGFTEYQYLGSC  
PGSDGSVITDTLSPASSPSSVTPVVPVGSVDDESPPGALNIECRICGDKASGYHYGVHACE  
GCKGFFRRTIRLKLVDKCDRSCIKIQKKNRNCQYCRFHKCLSVGMASHNAIRFGRMPRSE  
KAKLKAIEILTCEHDIEDSETADLKSALAKRIYEAYLKNFNMNKVKARVILSGKASNNPPFV  
IHDMETLCMAEKTIVAKLVANGIQNKEAEVRIFHCCQCTSVETVTELTEFAKAI PGFANL  
DLNDQVTLKYGVEYEAIFAMLSSVMNKDGMVAVGNGFITREFLKSLRKPFCDIMPKFD  
FAMKFNALELDDSDISLFAAIIICGDRPGLLNVGHIKMQEGIVHVLRLHLQSNHPDDI  
FLFPKLLQKMDLRLQVTEHAQLVQIIKKTESDAALHPLLQEIYRDMY

>hsa:5468

MTMVDTEMPFWPTNFGISSVDLSVMEDHSHSFDIKPFTTVDFFSISTPHYEDI PFTRTDP  
VVADYKYDLKLEQYQSAIKVEPASPPYYSEKTQLYNKPHEEPSNSLMAIECRVCGDKASG  
FHYGVHACEGCKGFFRRTIRLKLIVDRCDLNCRIHKKSRNKQYCRFQKCLAVGMASHNAI  
RFGMPQAEKEKLAEISSDIDQLNPESADLRALAKHLYDSYIKSFPLTKAKARAILTGK  
TTDKSPFVIYDMNSLMMGEDKIKFKHITPLQEQSKEVAIRIFQGCQFRSVEAVQEITEYA  
KSI PGFVNLDLNDQVTLKYGVEHIIYTMLASLMNKDGVLI SEGQGFMTREFLKSLRKP  
GDFMEPKFEFAVKFNALELDDSDLAIFIAVILSGDRPGLLNVKPIEDIQDNLLQALELQ  
LKLNHPESSQLFAKLLQKMTDLRQIVTEHVQLLQVIKKTETDMSLHPLLQEIYKDLY

>hsa:5914

MASNSSSCPTPGGGHLNGYPVPPYAFFFPMLGGLSPPGALTTLQHQLPVSGYSTPSPAT  
IETQSSSSEEIVSPSPPLPRIYKPCFVCQDKSSGYHYGVSACEGCKGFFRRSIQKNM  
VYTCHRDKNCI INKVTRNRCQYCRQLQKCFEVMGMSKESVRNDRNKKKKEVPKPECSESYTL  
TPEVGELIEKVRKAHQETFPALCQLGKYTTNNSSEQRVSLDIDLWDKFSELSTKCIKTV

EFAKQLPGFTTLTIADQITLLKAAACLDILILRICTRYTPEQDTMTFSDGLTLNRTQMHNA  
 GFGPLTDLVFAFANQLLPLEMDDAETGLLSAICLICGDRQDLEQPDRVDMLQEPLLEALK  
 VYVRKRRPSRPHMFPKMLMKITDLRSISAKGAERVITLKMIEPGSMPPLIQEMLENSEGL  
 DTLSGQPGGGGRDGGGLAPPPGSCSPSLSPSSNRSSPATHSP

>hsa:5915

MFD CMDVLSVSPGQILD FYTASPSSCMLQEKALKACFSGLTQTEWQHRHTAQS IETQSTS  
 SEELVSPSPPLPPRRVYKPCFVCQDKSSGYHYGVSA CEGCKGFFRRSIQKNMIY TCHR  
 KNCVINKVTRNRCQYCR LQKCFE VGM SKESVRNDRNKKKETS KQECTESYEMTAE LDDL  
 TEKIRKAHQETFP SLCQLGKYTTNSSADHRVRLDLGLWDFSELATKCI IKIVEFAKRLP  
 GFTGLTIADQITLLKAAACLDILILRICTRYTPEQDTMTFSDGLTLNRTQMHNAGFGPLTD  
 LVFTFANQLLPLEMDDTETGLLSAICLICGDRQDLEEPTKV DKLQEPLLEALKIYIRKRR  
 PSKPHMFPKILMKITDLRSISAKGAERVITLKMIEPGSMPPLIQEMLENSEGHEPLTPSS  
 SGNTAEHSPSISPSVSVENSGVVSQSPLVQ

>hsa:5916

MATNKERLFAAGALPGSGYPGAGFPFAFPGALRGSPPFEMLSPSFRGLQPDLPKEMAS  
 LSVETQSTSSEEMVPSSPSPPPPPRVYKPCFVCNDKSSGYHYGVSSCEGCKGFFRRSIQK  
 NMVY TCHRDKNCI INKVTRNRCQYCR LQKCFE VGM SKEAVRNDRNKKKKEVKEEGSPDSY  
 ELSPQLEELITKVS KAHQETFP SLCQLGKYTTNSSADHRVQLDLGLWDFSELATKCI IK  
 IVEFAKRLPGFTGLSIADQITLLKAAACLDILMLRICTRYTPEQDTMTFSDGLTLNRTQM  
 H NAGFGPLTDLVFAFAGQLLPLEMDDTETGLLSAICLICGDRMDLEEPEKVDKLQEPLLEA  
 LRLYARRRRPSQPYMFPRLMKITDLRGI STKGAERAITLKMIEPGMPPLIREMLENPE  
 MFEDDSSQPGPHPNASSEDEVPGGQKGLKSPA

>hsa:6095

MNEGAPGSDSLETEARVPWSIMGHCLRTGQARMSATPTPAGEGARSSSTCSSLSRLFWSQ  
 LEHINWDGATAKNFINLREFFSLLPALRKAQIEIIPCKICGDKSSGIHYGVITCEGCKG  
 FFRSQSNATYSCPRQKNCLIDRTSRNRCQHCR LQKCLAVGMSRDAVKFGRMSKKQRDS  
 LYAEVQKHRMQQQQRDHQQQPGEAEPLTPTYNISANGLTE LHDDLSNYIDGHTPEGSKAD  
 SAVSSFYLDIQSPDQSGLDINGIKPEPICDYTPASGFFPYCSFTNGETSPTVSMAELEH  
 LAQNIKSHLET CQYLREELQITWQTFLOEEIENYQNKQREVMWQLCAIKITEAIQYVV  
 EFAKRIDGFMELCQNDQIVLLKAGSLEVV FIRMCRAFDSQNN TVYFDGKYASPDVFKSLG  
 CEDFISFVFEFGKSLCSMHLTEDEIALFSAFVLSADR SWLQEKVKIEKLQOKIQLALQH  
 VLQKNHREDGILT KLICKVSTLRALCGRHTEKLMAFKAIYPDIVRLHFPPLYKELFTSEF  
 EPAMQIDG

>hsa:6096

MRAQIEVIPCKICGDKSSGIHYGVITCEGCKGFFRRSQNNASYS CPRQRNCLIDRTNRN  
 RCQHCR LQKCLALGMSRDAVKFGRMSKKQRDSLHAEVQKHQORLQEQRQQQSGEAEALAR  
 VYSSSISNGLSNLNNETS GTYANGHVIDLPKSEGYNVDSGQSPDQSGLDMTGIKQIKQ  
 EPIYDLT SVPNLFTYSSFNNGQLAPGITMTEIDRIAQNIKSHLET CQYTMEE LHQLAWQ  
 THTYEEIKAYQSKSREALWQQCAIQITHAIQYVVEFAKRITGFMELCQNDQILLLKSGCL  
 EVVLVRCRAFNP LNNTVLFEGKYGGM QMFKALGSDDLVNEAFDFAKNLC SLQLTEEEIA  
 LFSSAVLISP DRAWLIEPRKVQKLQEKIYFALQHV IQKNHLDDETLAKLIAKIPTITAVC  
 NLHGEKLQVFKQSHPEIVNTLFPPLYKELFNPDCATGCK

>hsa:6097

MRTQIEVIPCKICGDKSSGIHYGVITCEGCKGFFRRSQRCNAAYSCTRQONCPIDRTSRN  
 RCQHCR LQKCLALGMSRDAVKFGRMSKKQRDSLHAEVQKQLQQRQQQQQEPVVKTPPAGA  
 QGADTLTYTLGLPDGQLPLGSSPDLPEASACPPG LLLKASGSGPSYSNNLAKAGLNGASCH  
 LEYSPERGAEGRESFYSTGSQ LTPDRCGLRFEEHRHPGLGELGQGPDSYSGSPSFRSTPE  
 APYASLTEIEHLVQSVCKSYRETCQLRLEDLLRQRSNIF SREEVTGYQRKSMWEMWERCA  
 HHLTEAIQYVVEFAKRLSGFMELCQNDQIVLLKAGAMEVVLVRCRAYNADNRTVFFEGK  
 YGGMELFRALGCELISSIFDFSHLSALHFSEDEIALY TALVLINAHRPGLQEKRKVEQ  
 LQYNLELAFHHHLCKTHRSILAKLPPKGLRSLCSQHVERLQIQHLHPPIVQAAF PPL  
 YKELFSTETESPVGLSK

>hsa:6256

MDTKHFLPLDFSTQVNSSLTSP TGRGSMAAPSLHPSLPGIGSPGQLHSPISTLSSPING  
 MGPPFSVISSPMGPHSMSVPTPTTLGFSTGSPQLSSPMNPVSSSEDIKPPLGLNGVLKVP  
 AHPSGNMASFTKHCICGDRSSGKHYGVYSC ECGCKGFFKRTVRKDLTYTCRDNKDCLID  
 KRQNRNCQYCRYQKCLAMGMKREAVQEERQRGKDRNENEVESTSSANEDMPVERILEAEL  
 AVEPCTETYVEANMGLNPSSPNDPVTNICOADKQLFTLVEWAKRIPHSELPLDDQVIL  
 LRAGWNELLIASFSHRSIAVKDGILLATGLHVHRNSAHSAGVGAIFDRVLTTELVS KM RDM  
 QMDKTELGCLRAIVL FNPDSKGLSNPAEVEALREKVYASLEAYCKHKYPEQPGRFKLLL  
 RLPALRSIGLKCLEHLFFFKLIGDTPIDTFLMEMLEAPHQMT

>hsa:6257

MSWAARPPFLPQRHAAGQCGPVGVRKEMHCGVASRWRRRRPWLDPAAAAAAVAGGEQQT  
PEPEPGEAGRDGMGDSGRDSRSPDSSSPNPLPQGVPPSPGPPPLPSTAPSLGGSGAPP  
PPMPPPPPLGSPFPVIVSSSMGSPGLPPPAPPFGFSGPVSSPQINSTVSLPGGGSGPPEDVK  
PPVLGVRGLHCPPPPGGPGAGKRLCAICGDRSSGKHVYVYSCGCKGFFKRTIRKDLTYS  
CRDNKDC'TVDKRQRNRCQYCRYQKCLATGMKREAVQEERQRGKDKDGDGEGAGGAPEEMP  
VDRI LEAE LAVEQKSDQGVVEGPGGTGGSGSSPNDPVTNICQAADKQLFTLVWAKRIPHF  
SSLPDDQVILLRAGWNELLIASFSHRSIDVRDGI LLATGLHVHRNSAHSAGVGAIFDRS  
LSRVLTSLVSKMRDMRMDKTELGCLRAIILFNPDAGLSNPSEVEVLREKVYASLETYCK  
QKYPEQQGRFAKLLLRPALRSIGLKCLEHLFFFKLIGDTPIDTFLMEMLEAPHQLA

>hsa:7421

MEAMAASLSDPDPGDFDRNVPRICGVCGDRATGFHFNAMTCEGCKGFFRRSMKRKALFTC  
PFNGDCRITKDNRRHCQACRLKRCVDIGMMKEFILTDEEVQRKREMILKRKEEEALKDSL  
RPKLSEEQQRI IAILLDAHHKTYDPTYSDFCQFRPPVRVNDGGGSHPSRPNRSRHTPSFSG  
DSSSSCSDHCTISSDMMDDSSSFNLDLSEEDSDPSVTLELSQLSMLPHLADLVSYSIQK  
VIGFAKMI PGFRDLTSEDQIVLLKSSAIEVIMLRSNESFTMDDMSWTCGNQDYKYRVSDV  
TKAGHSLELIEPLIKFQVGLKLLNLHEEEHVLLMAICIVSPDRPGVQDAALIEAIQDRLS  
NTLQTYIRCRHPPPGSHLLYAKMIQKLADLRSLNEEHSKQYRCLSFQPECSMKLTPLVLE  
VFGNEIS

>hsa:8856

MEVRPKESWNHADVFHCEDESVPGKPSVNADEEVGGPQICRVCGDKATGYHFNVMTCG  
CKGFFRRAMKRNARLRCPFRKGACEITRKRTRRQCQACRLKRCLESGMKKEMIMSDEAVEE  
RRALI KRKKSERTGTQPLGVQGLTEEQRMIRELMDAQMKTFDTTFSHFKNFRLPGVLSS  
GCELPESLQAPSREEAAKWSQVRKDLCSLKVSLQLRGEDGSVWNYKPPADSGGKEIFSL  
PHMADMSTYMFKGIISFAKVISYFRDLPIEDQISLLKGA AFELCQLRFNTVFNAETGTWE  
CGRLSYCLEDTAGGFQQLLEPMLKFHYMLKLLQLHEEEYVLMQAI SLFSPDRPGVLQHR  
VVDQLQEQAIFATLKS YIECNRPQPAHRFLFLKIMAMLT ELSINAQHTQRLLRIQDIHPF  
ATPLMQELFGITGS

>hsa:9970

MASREDELNRNCVCGDQATGYHFNALTCEGCKGFFRRRTVSKSIGPTCPFAGSCEVSKTQR  
RHC PACRLQKCLDAGMRKDMI LSAEALALRRAKQAQORRAQQTPVQLSKEQEELIRTL LGA  
HTRHMGTMFEQFVQFRPPAHLFIHQPLPTLAPVLPVTHFADINTFMVLQVIKFTKDLP  
VFRSLPIEDQISLLKGA AVEICHIVLNTTFC LQTQNF LCGPLRYTIEDGARVGFQVEFLE  
LLFHFHGT LRLKLQLEPEYVLLAAMALFSPAPYLTD R PGVTQRDEIDQLQEEMALTLQSY  
IKGQQRPRDRSPGTPWIHWSGKMLGPKIGPGSKGAQWLQ

>hsa:9971

MGSKMNLIEHSHLPTTDEF SFS ENLFGVLTEQVAGPLGQNL E VEPYSQYSNVQFPQVQPO  
ISSSSYYSNLGFYPQQPEEWYSPGIYELRRMPAETLYQGETEVAEMPVTKKPRMGASAGR  
IKGDEL CVCGDRASGYHYNALTCEGCKGFFRRSITKNAVYCKKNGGNCVMDMYMRRKCQ  
ECRLRKCKEMGMLAECEMYTGLL TEIQCKSKRLRKNVKQHADQTVNEDSEGRDLRQVTSTT  
KSCREKTELTPDQQTLLHFIMDSYNKQRMPEITNKILKEEFSAEENFLILTEMATNHVQ  
VLVEFTKLPGFQTLDHEDQIALLKGS AVEAMFLRS AEI FNKKLPSGHS DLLEERIRNSG  
ISDEYITPMFSFYKSIGELKMTQEYALLTAIVILSPDRQYIKDREAVEKLEP LLDVLQ  
KLCKIHQPENPQHFACLLGR LTELRTFNHHHAEMLSWRVNDHKFTPLLCEIWDVQ

© 2014 by the authors; licensee MDPI, Basel, Switzerland. This article is an open access article distributed under the terms and conditions of the Creative Commons Attribution license (<http://creativecommons.org/licenses/by/3.0/>).
